# Supplementary material
Source: PubMed Central journal article supplement (PMC4249301)
Supplement: IAI.02282-14_zii999090967so1.pdf [file IAI.02282-14_zii999090967so1.pdf]

**Table S1. Plasmid and oligonucleotides**

| <b>Plasmid and oligos</b> | <b>Description<sup>a,b</sup></b>                | <b>Source</b> |
|---------------------------|-------------------------------------------------|---------------|
| <b>Plasmid</b>            |                                                 |               |
| pG1ts                     | Thermosensible shuttle vector, Erm <sup>R</sup> | (1)           |
| <b>Oligos</b>             |                                                 |               |
| M13FW                     | AGGGTTTTCCCAGTCACGACGTT                         |               |
| M13RV                     | GAGCGGATAACAATTTACACACAGG                       |               |
| EryFW                     | GAGTGAAAAAGTACTCAAC                             |               |
| EryRV                     | GACAATACTTGCTCATAAGTA                           |               |
| 660UF                     | GTAGGT <u>ACCG</u> GATAAGAGAGGGAATAAGT          |               |
| 660UR                     | TTA <u>CCCGGG</u> CATCTACTACTCGATCATA           |               |
| 660DF                     | TTA <u>CCCGGG</u> TCCAGCCTAAAGATATTAC           |               |
| 660DR                     | CTTGGAT <u>CCT</u> AAACACGGTTTTTCTGTCTA         |               |

<sup>a</sup> Erm<sup>R</sup> erythromycin resistance

<sup>b</sup> underlined nucleotides represent restriction sites

#### REFERENCES

(1) Danne C, Guerrillot R, Glaser P, Trieu-Cuot P, Damsi S. 2013. Construction of isogenic mutants in *Streptococcus gallolyticus* based on the development of new mobilizable vectors. Res Microbiol. **164** :973-8
