# Supplementary material
Source: PubMed Central journal article supplement (PMC4249301)
Supplement: IAI.02282-14_zii999090967so9.pdf [file IAI.02282-14_zii999090967so9.pdf]

## Supplementary Figure Legends

### Figure S1

**In vitro** susceptibility of COH1 (panel A and B) and H36B (panel C and D) GBS strains and their mutants to various concentrations of erythromycin and clindamycin. WT-COH1 and WT-H36B, wild type strains; *erm*COH1 and *erm*H36B, strains carrying a constitutively activated *ermC* gene.

### Figure S2

**Inflammatory responses induced in BMDMs by RNA extracted from bacteria with constitutive MLS resistance.** TNF- $\alpha$  (A) and nitric oxide (B) production in BMDMs;  $5 \times 10^5$  macrophages were treated with 0.1, 1 or 10  $\mu\text{g/ml}$  concentrations of RNA extracted from WT-COH1 or *erm*COH1 strains or with LPS (100 ng/ml) and Dotap (25  $\mu\text{g/ml}$ ) as positive and negative controls, respectively. After 24 hours supernatants were collected and TNF- $\alpha$  or nitric oxide were evaluated by ELISA and Griess test, respectively. Statistical evaluation was performed by the Student's *t* test. \*\* $p < 0.01$ ; \* $p < 0.05$ . Data shown are means + SD of triplicate observations conducted in one experiment representative of three independent experiments.

### Figure S3

**Inflammatory responses in BMDMs stimulated with killed bacteria.** TNF- $\alpha$  (A) and nitric oxide (B) production in wild type C57BL/6 BMDMs;  $5 \times 10^5$  macrophages were treated with different concentrations (0.1, 1, 5, 10 or 50  $\mu\text{g/ml}$ ) of heat-killed WT-COH1 and *erm*COH1 bacteria or with LPS (100 ng/ml) as a positive control. TNF- $\alpha$  and nitric oxide were measured in supernatants collected after 24 hours. Statistical evaluation was performed by the Student's *t* test. \*\*\* $p < 0.001$ ; \*\* $p < 0.01$ ; \* $p < 0.05$ . Data shown are means + SD of triplicate observations conducted in one

experiment representative of three independent experiments.

#### Figure S4

**Requirements for *in vitro* inflammatory responses to killed GBS.** Nitric oxide induction in BMDCs with defects in MyD88, UNC93b1 (3d) (A), multiple (TLR7/8/9 or TLR3/7/9/11) (B) or single (TLR7, TLR8 or TLR9) TLRs (C).  $5 \times 10^5$  cells were treated with 0.1, 1 or 10  $\mu\text{g/ml}$  of heat-killed WT-COH1 or *erm*COH1 bacteria or with the TLRs agonists LPS (100ng/ml), CpG B (10 $\mu\text{g/ml}$ ) and CL264 (25 $\mu\text{g/ml}$ ). NO levels were measured in supernatants collected after 24 hours. Statistical evaluation was performed by the Student's *t* test. \*\*\* $p < 0.001$ ; \*\* $p < 0.01$ ; \* $p < 0.05$ . Data shown are means + SD of triplicate observations conducted in one experiment and are representative of three independent experiments.

#### Figure S5

**TLR requirements for inflammatory responses to killed GBS in BMDMs.** TNF- $\alpha$  (A) and nitric oxide (B) induction in BMDMs with defects in multiple (TLR3/7/9/11<sup>-/-</sup>) or single (TLR7<sup>-/-</sup>, TLR8<sup>-/-</sup> or TLR9<sup>-/-</sup>) TLR:  $5 \times 10^5$  cells were treated with 0.1, 1 or 10  $\mu\text{g/ml}$  concentrations of heat-killed WT-COH1 or *erm*COH1 bacteria or with the TLRs agonists LPS (100ng/ml), CpG B (10 $\mu\text{g/ml}$ ) and CL264 (25 $\mu\text{g/ml}$ ). TNF- $\alpha$  and nitric oxide were measured in supernatants collected after 24 hours. Statistical evaluation was performed by the Student's *t* test. \*\*\* $p < 0.001$ ; \* $p < 0.05$ . Data shown are means  $\pm$  SD of triplicate observations conducted in one experiment and are representative of three independent experiments.

#### Figure S6

**Requirements for *in vitro* inflammatory responses to live GBS.** Nitric oxide induction in BMDCs from C57BL/6 (A) or from BMDC with defects in multiple (TLR7/8/9) or single (TLR2, TLR7, TLR8 or TLR9) TLRs (B) or MyD88 and UNC93b1 (3d) (C).  $5 \times 10^5$  cells were treated with 5, 10 or 20 MOIs of WT-COH1 or *erm*COH1 bacteria or with the TLR agonists LPS (100ng/ml), CpG B (10 $\mu\text{g/ml}$ ) and CL264 (25 $\mu\text{g/ml}$ ). NO levels were measured in supernatants collected after 24 hours. Statistical evaluation was performed by

the Student's *t* test. \*\*\**p* < 0.001. Data shown are means + SD of triplicate observations conducted in one experiment and are representative of three independent experiments.

### **Figure S7**

**Inflammatory responses in BMDMs stimulated with live bacteria.** TNF- $\alpha$  (A) and nitric oxide (B) production in wild type C57BL/6 BMDMs;  $5 \times 10^5$  macrophages were treated with 5, 10 or 20 MOIs of live WT-COH1 and *erm*COH1 bacteria or with LPS (100 ng/ml) as a positive control. TNF- $\alpha$  and nitric oxide were measured in supernatants collected after 24 hours. Data shown are means + SD of triplicate observations conducted in one experiment representative of three independent experiments.
