# Supplementary material
Source: PubMed Central journal article supplement (PMC4249301)

Fig. S1

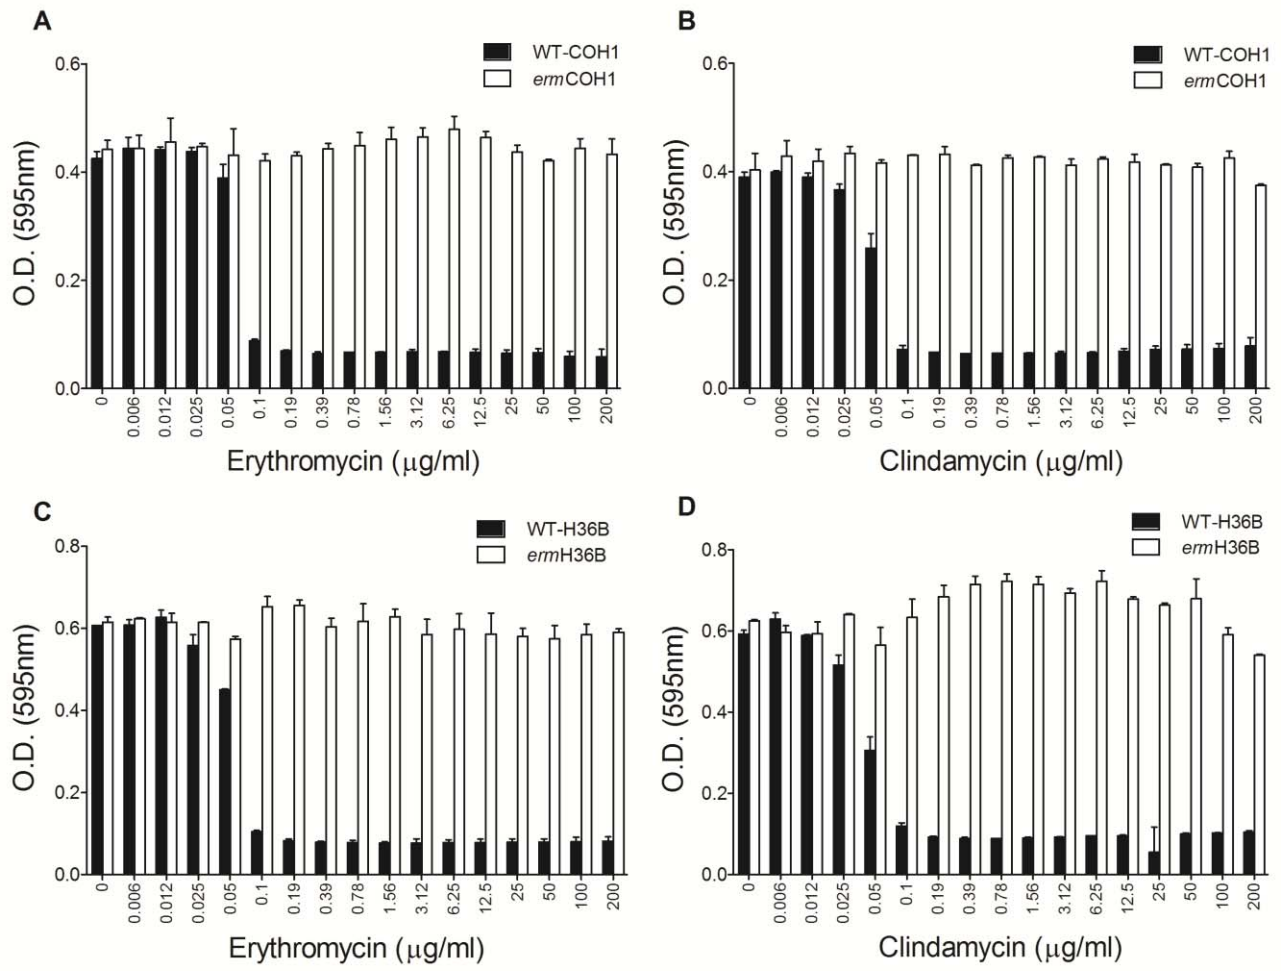

Supplement: IAI.02282-14_zii999090967so2.pdf [file IAI.02282-14_zii999090967so2.pdf]

**Fig. S2**

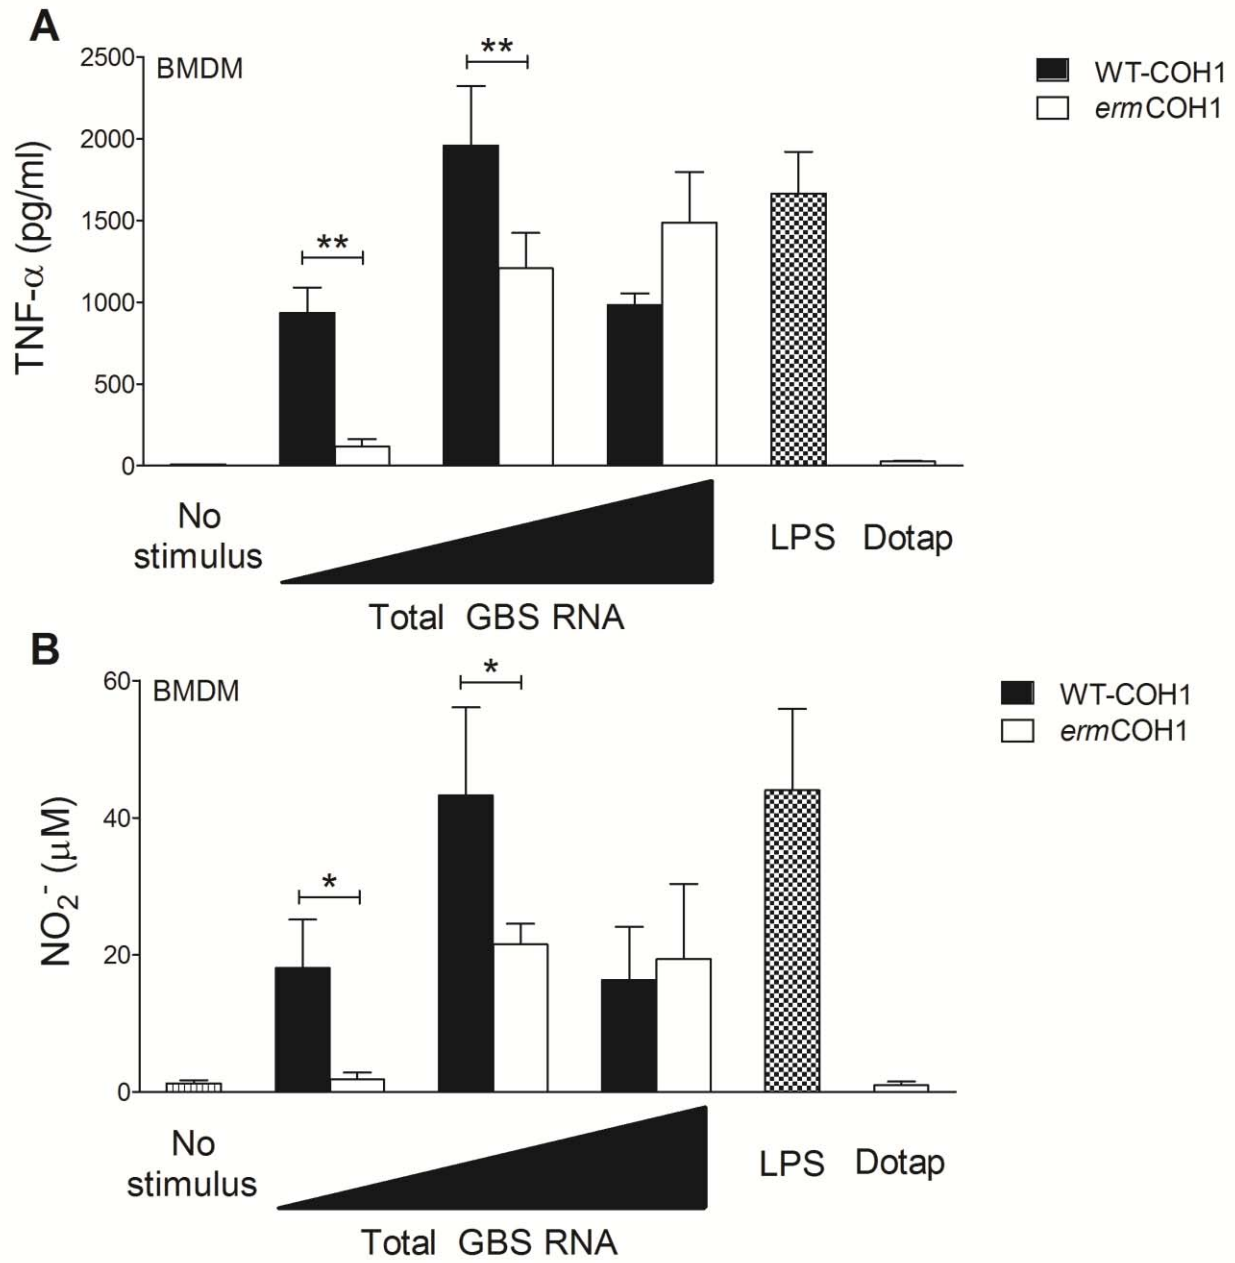

Supplement: IAI.02282-14_zii999090967so3.pdf [file IAI.02282-14_zii999090967so3.pdf]

**Fig. S3**

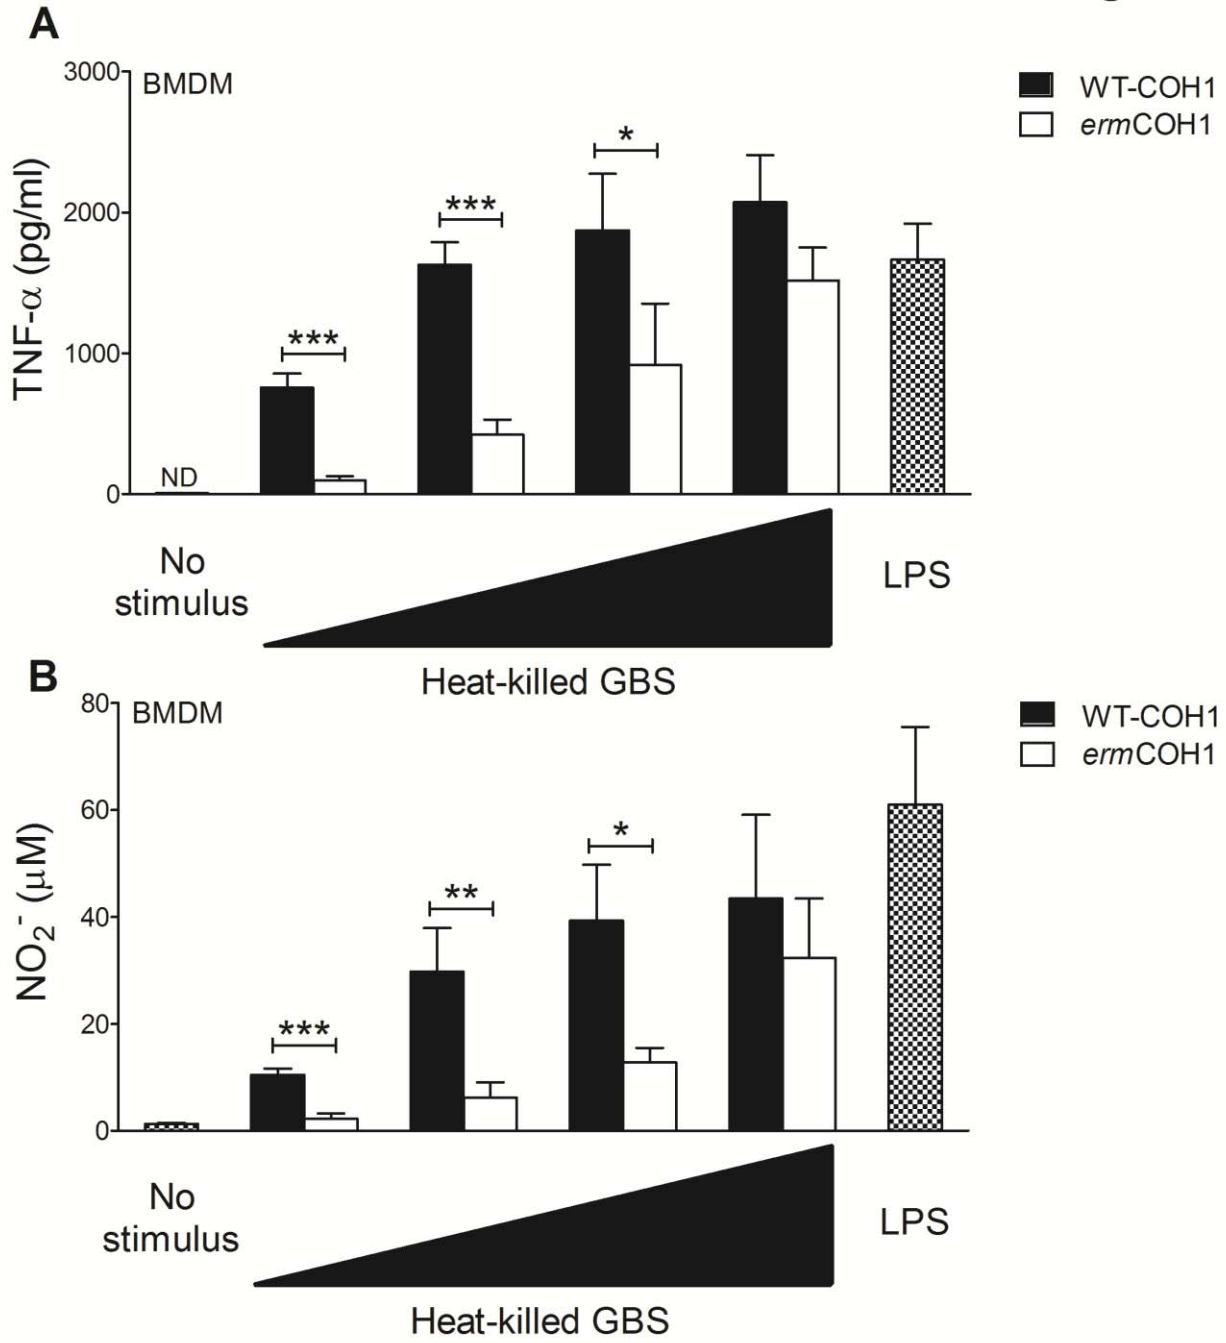

Supplement: IAI.02282-14_zii999090967so4.pdf [file IAI.02282-14_zii999090967so4.pdf]

**Fig. S4**

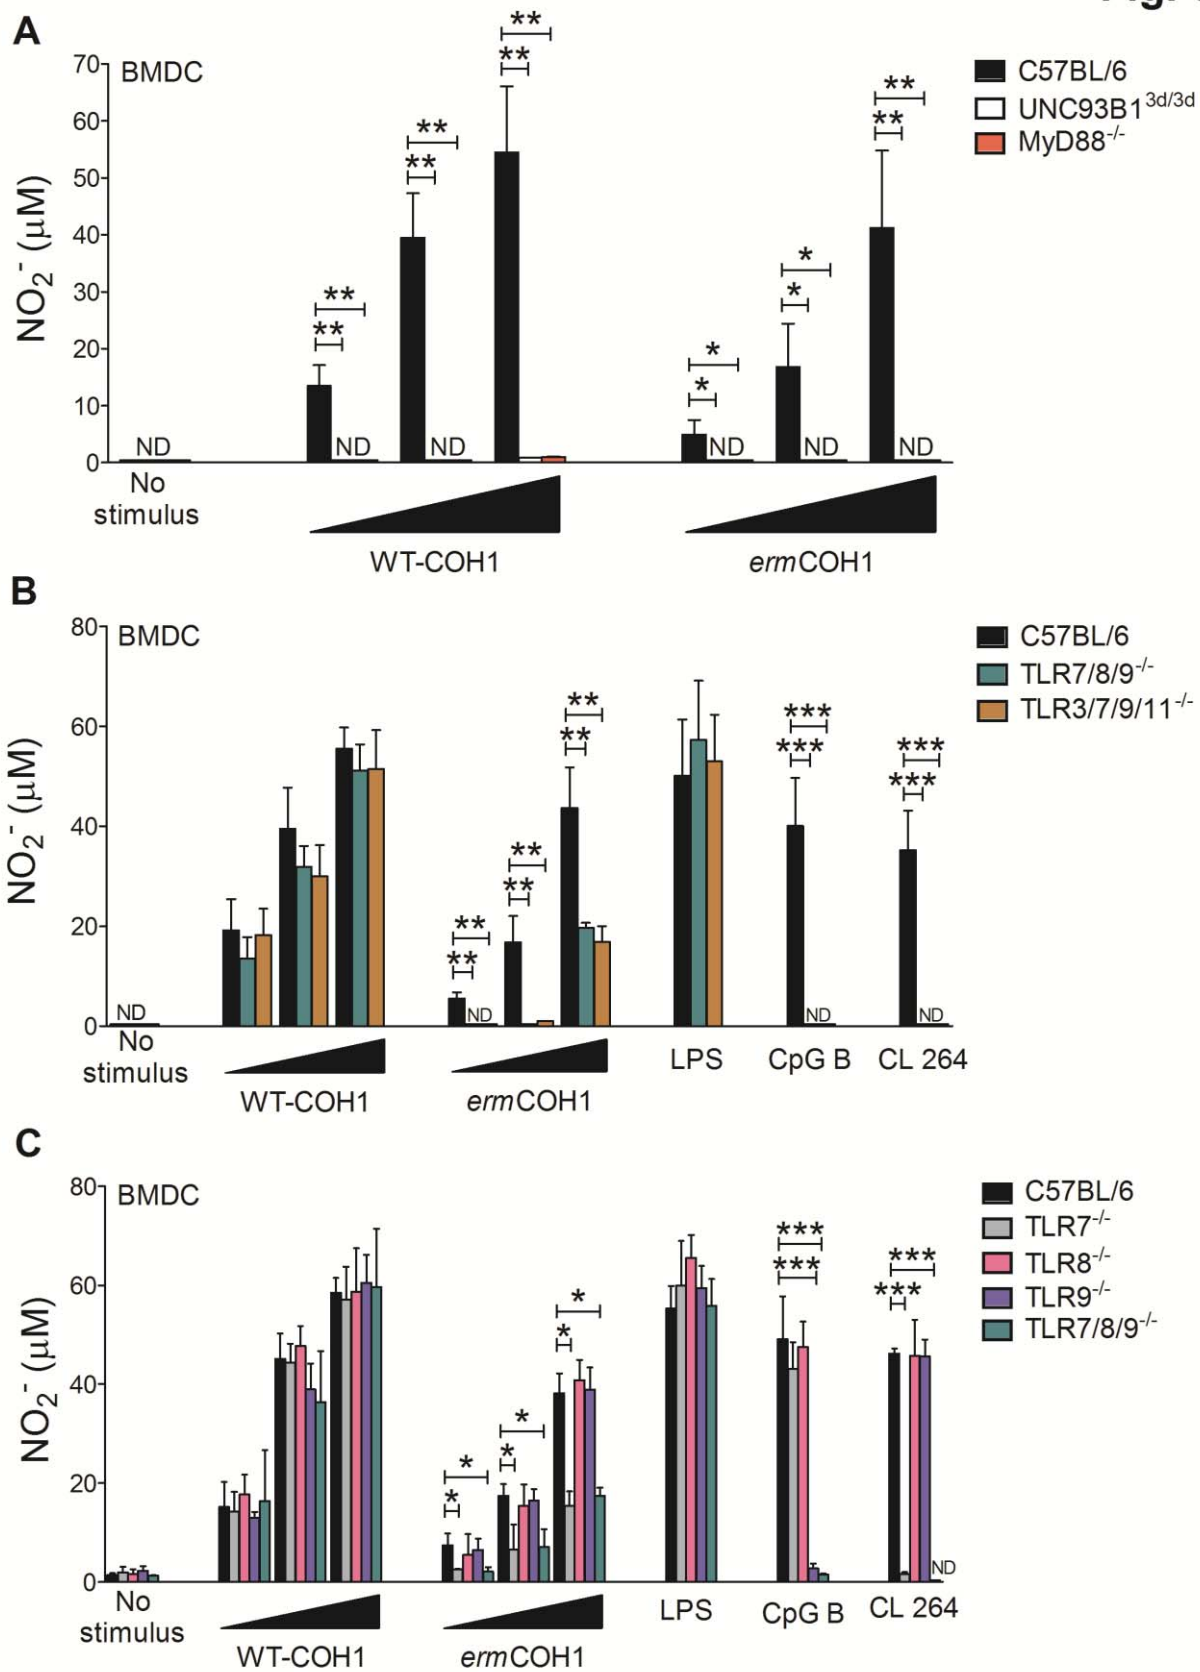

Supplement: IAI.02282-14_zii999090967so5.pdf [file IAI.02282-14_zii999090967so5.pdf]

**Fig. S6**

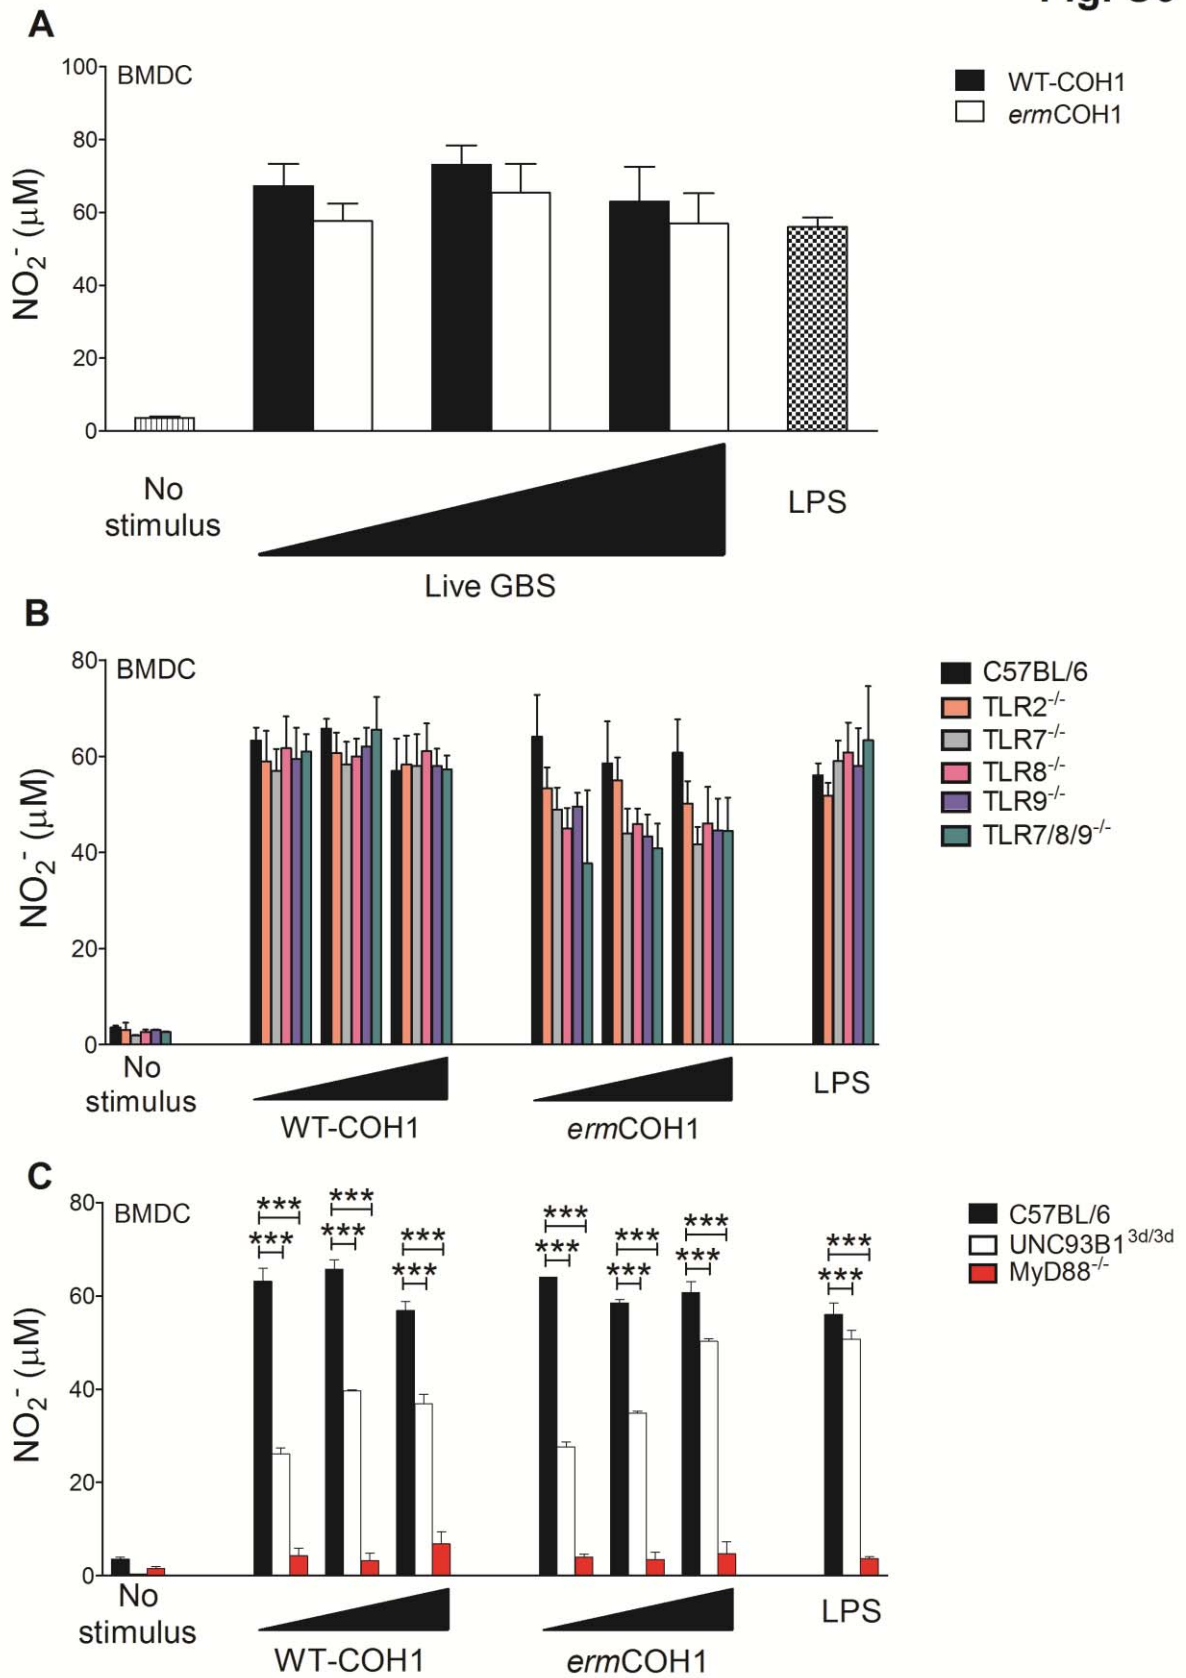

Supplement: IAI.02282-14_zii999090967so7.pdf [file IAI.02282-14_zii999090967so7.pdf]

Fig. S7

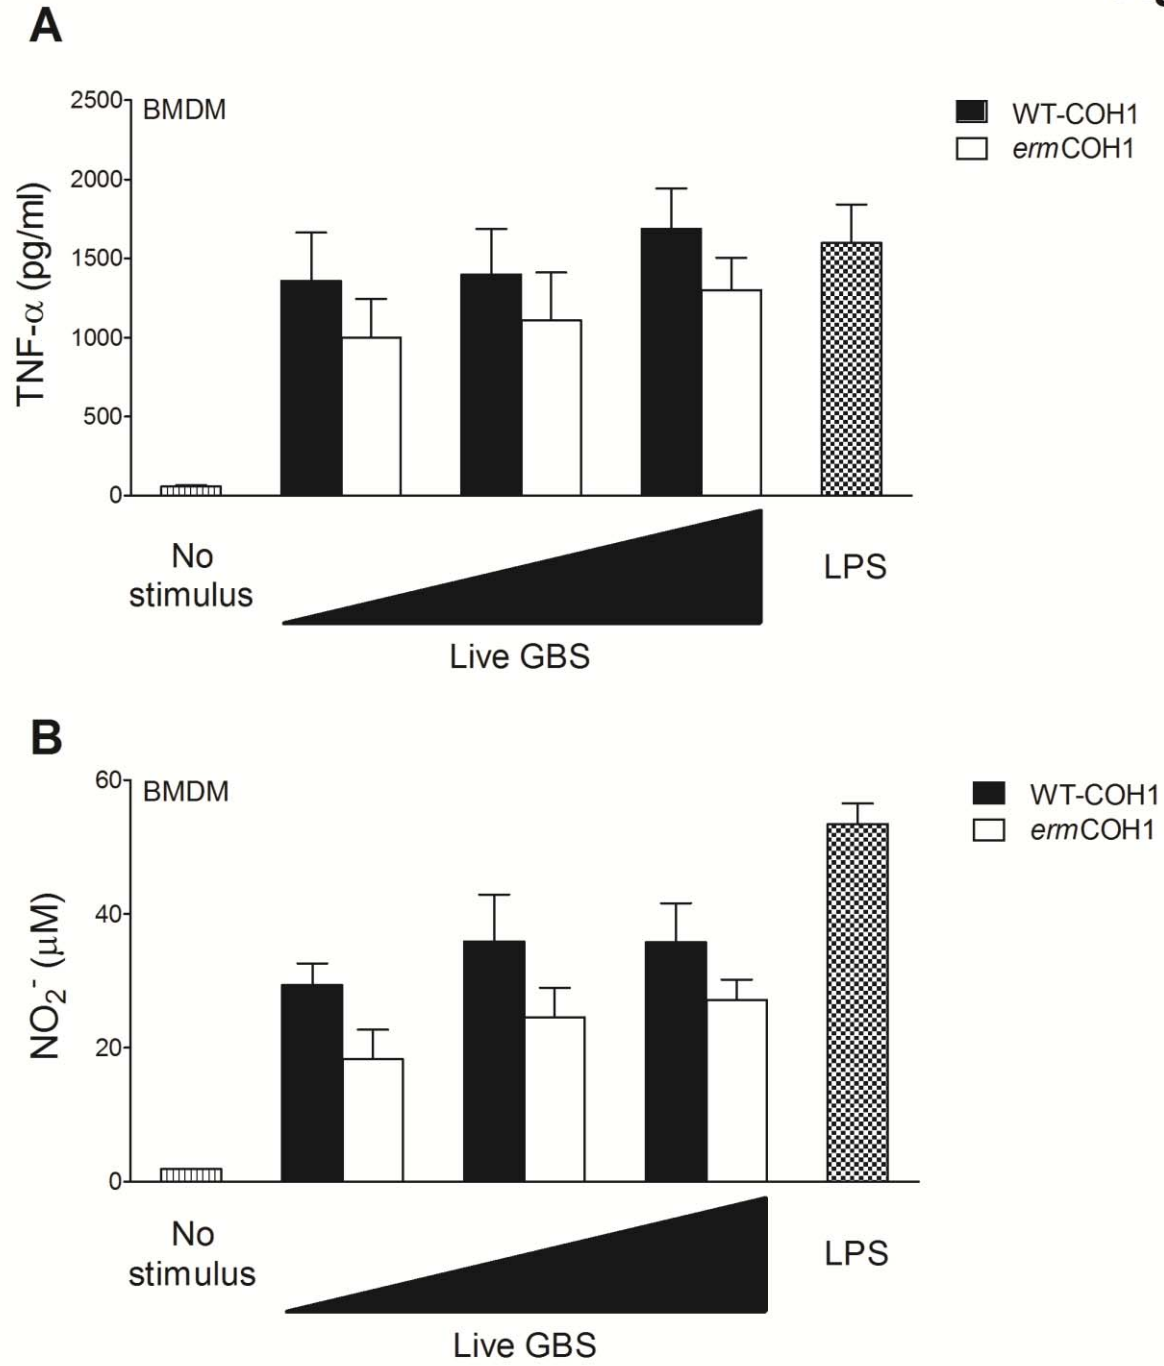

Supplement: IAI.02282-14_zii999090967so8.pdf [file IAI.02282-14_zii999090967so8.pdf]
